# Supplementary material for: Preparation of nano-t-Se with different particle sizes and particle size dependence of the melting thermodynamics
Source: Royal Society of Chemistry journal article supplement (doi:10.1039/c9ce00953a), 2019-01-01
Supplement: c9ce00953a1.pdf [file c9ce00953a1.pdf]

## Supplementary Information

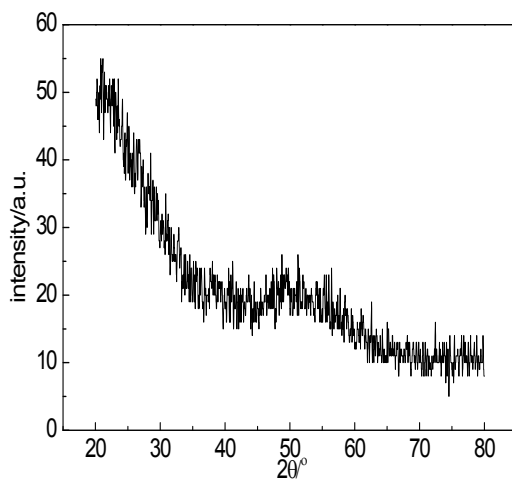

**Fig. S1** XRD patterns of amorphous selenium XRD

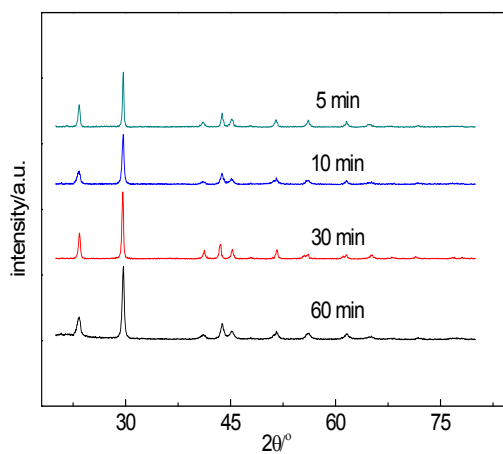

**Fig. S2** XRD patterns of nano-selenium at different ultrasonic time

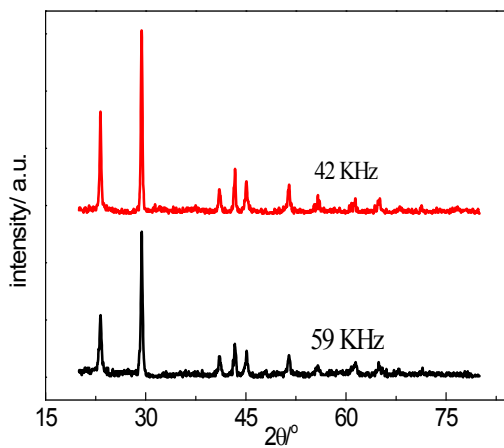

**Fig. S3** XRD patterns of nano-selenium prepared with different ultrasonic frequencies

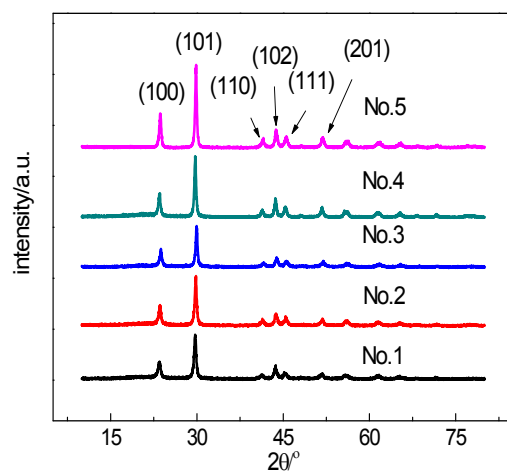

**Fig. S4** XRD patterns of spherical nano-selenium with different diameters
